# Supplementary material for: Biochemical and Structural Insights Concerning Triclosan Resistance in a Novel YX7K Type Enoyl-Acyl Carrier Protein Reductase from Soil Metagenome
Source: PubMed Central journal article supplement (PMC6817880; doi:10.1038/s41598-019-51895-2), 2019-10-28
Supplement: 41598_2019_51895_MOESM1_ESM.pdf [file 41598_2019_51895_MOESM1_ESM.pdf]

1 **Biochemical and Structural Insights Concerning Triclosan Resistance in a Novel YX7K**  
2 **Type Enoyl-Acyl Carrier Protein Reductase from Soil Metagenome**

3

4 Running title: Triclosan resistant enoyl-ACP reductase in eukaryotes and prokaryotes

5

6 Raees Khan<sup>a,b,†</sup>, Amir Zeb<sup>c,†</sup>, Kihyuck Choi<sup>a</sup>, Gihwan Lee<sup>c</sup>, Keun Woo Lee<sup>c\*</sup>, Seon-Woo

7 Lee<sup>a\*</sup>

8

9 *<sup>a</sup>Department of Applied Bioscience, Dong-A University, Busan 49315, Republic of Korea*

10 *<sup>b</sup>Department of Biological Sciences, National University of Medical Sciences, Rawalpindi*  
11 *46000, Pakistan*

12 *<sup>c</sup>Division of Applied Life Science (BK21 Plus Program), Plant Molecular Biology and*  
13 *Biotechnology Research Center (PMBBRC), Research Institute of Natural Science (RINS),*  
14 *Gyeongsang National University, Jinju 52828, Republic of Korea*

15

16 \*Corresponding author Seon-Woo Lee

17 Email: seonlee@dau.ac.kr

18 TEL: +82-51-200-7551

19 FAX: +82-51-200-7505

20 or

21 Keun Woo Lee

22 Email: kwlee@gnu.ac.kr

23 TEL: +82-55-772-1360

24 FAX: +82-55-772-1359

25 <sup>†</sup>These authors contributed equally to this work.

## [Fig. S1, Raees Khan et al.]

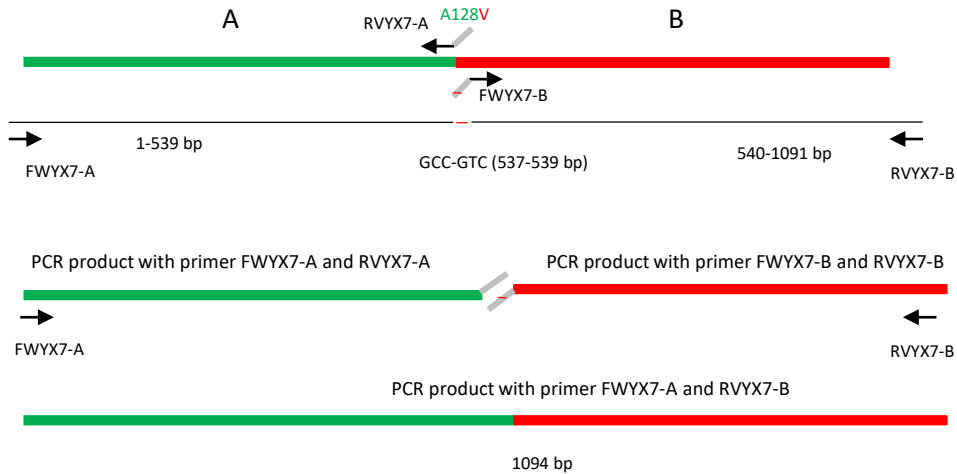

**Fig. S1. Site-directed mutagenesis using overlap extension PCR to substitute A128V.** The *FabI2* gene sequence along with additional nucleotides on the 5' and 3' ends (for primer designing and promoter regions) were divided into two regions; A and B. Region "A" contain the A128 encoding region of *FabI2* which will be substituted with V128, already incorporated in the RVYX7-A primer. Fragments "A" and "B" were amplified using mentioned primers which carries complementary overlapping nucleotide sequences (presented as gray overhangs) for the purpose of fusion PCR. Both fragments were finally fused using primers FWYX7-A and RVYX7-B to create mFabI2 with the A128V substitution.

[Fig. S2, Raees Khan et al.]

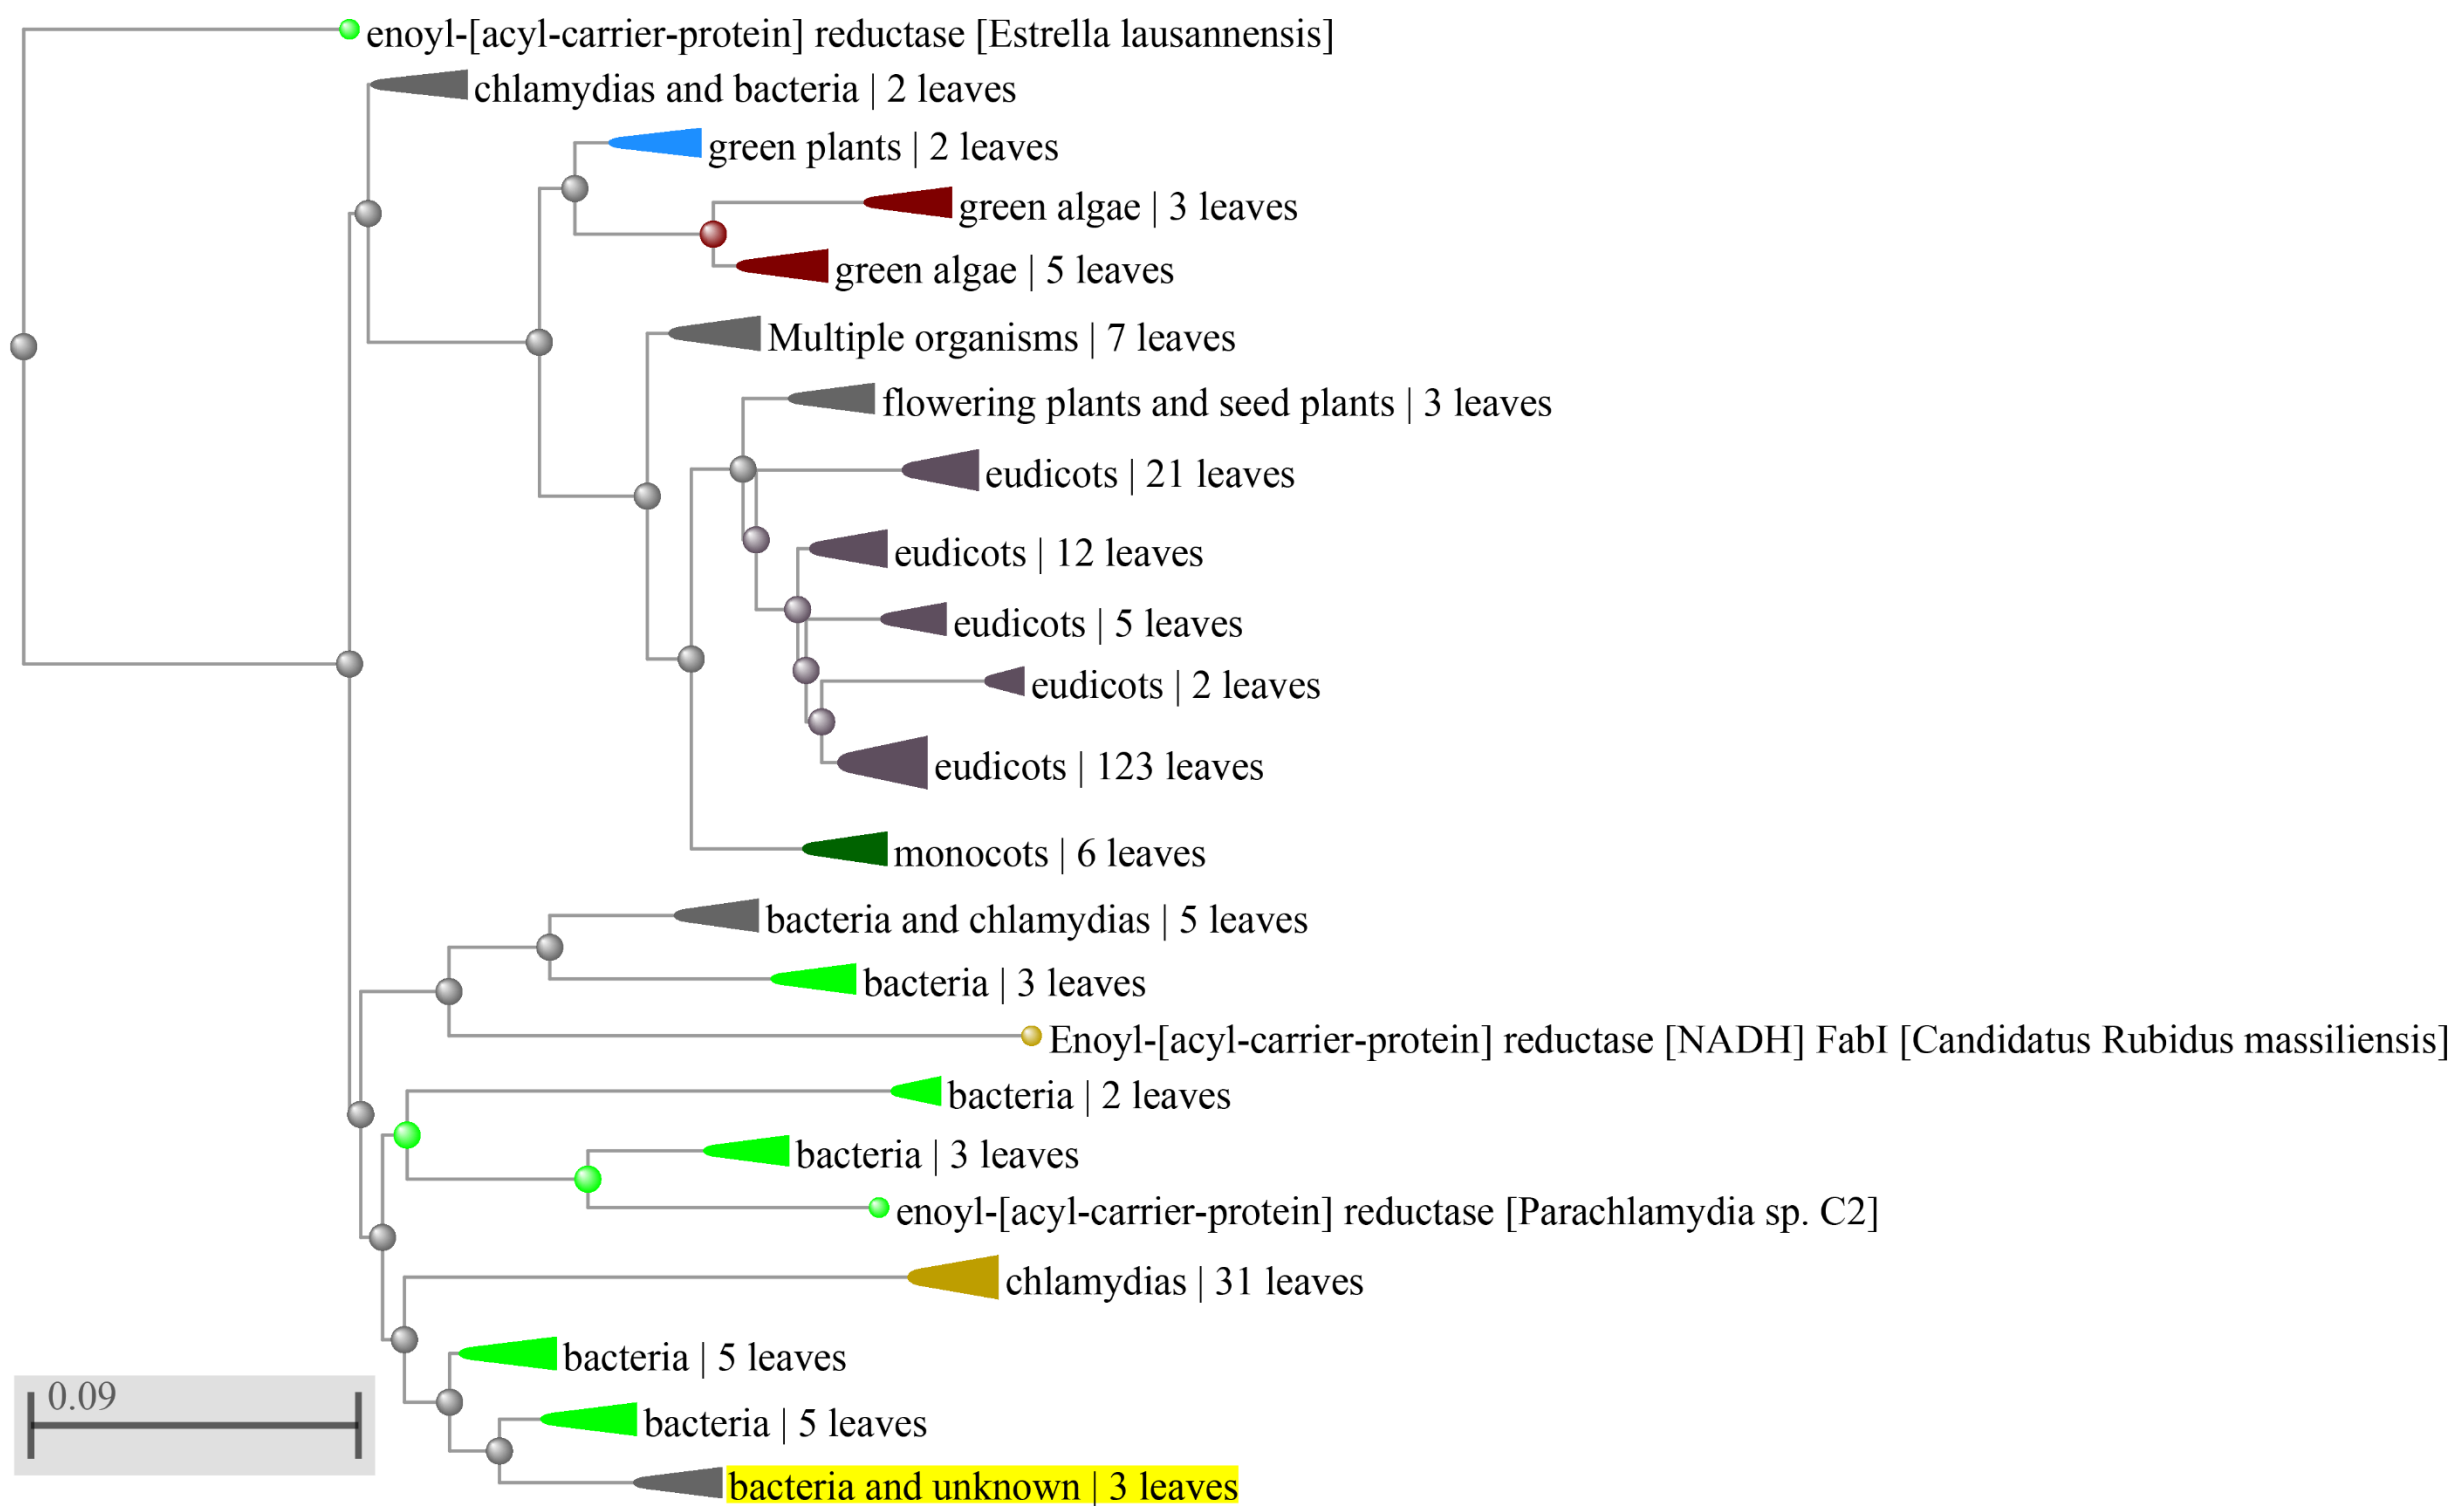

**Fig. S2. Distance tree of FabI2 ENR.** Fast minimum evolution method based phylogenetic tree was constructed using the “Distance tree of results” option of the NCBI blastp results. The closest 250 hits were selected, sharing 66-84% identity to FabI2. The maximum sequence difference was set at 0.85 and the scale bar represents 0.09 estimated amino acid substitutions per residue. Label color for the query is yellow, whereas for other closest hits various label colors have been assigned. The size of the leaf represents the number of hits corresponding to it.

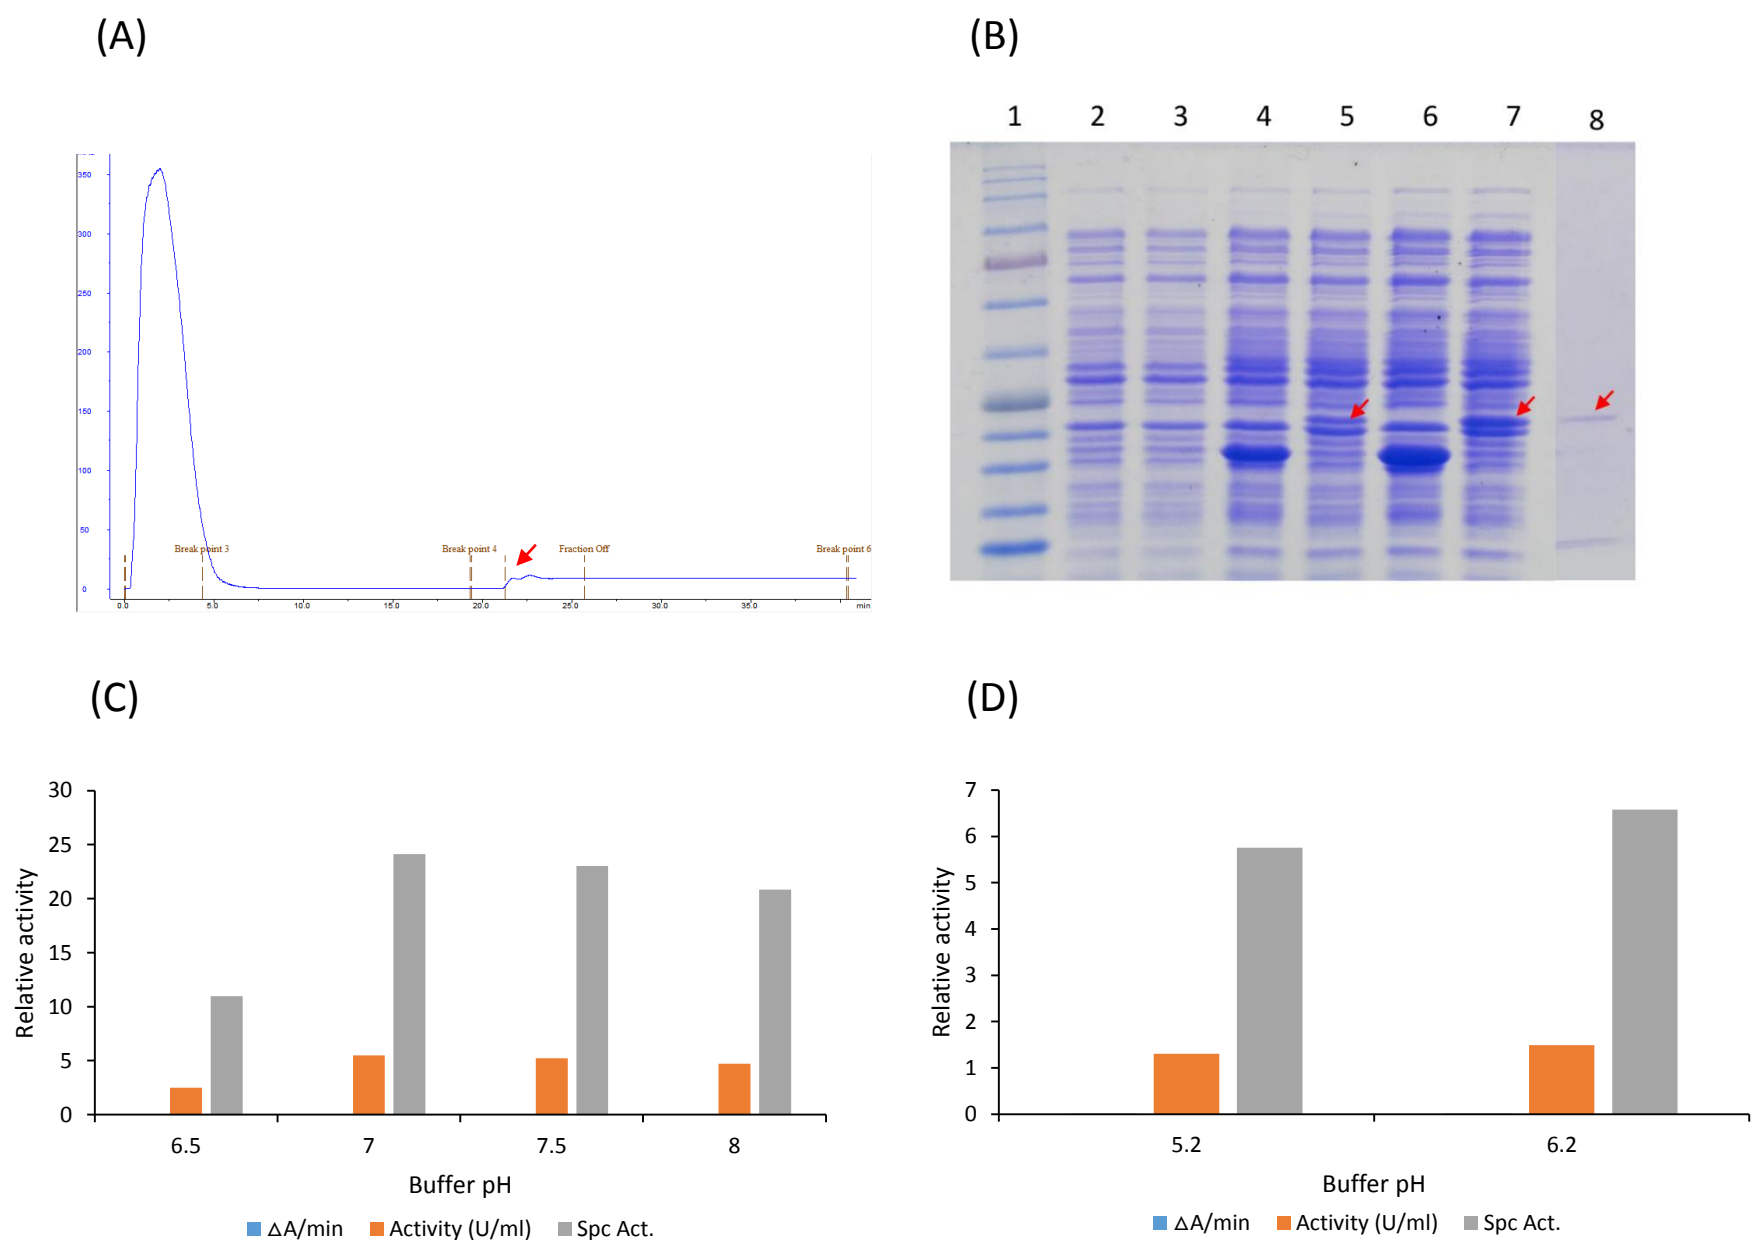

**Fig. S3. Purification of FabI2 protein.** (A) FPLC chromatogram of FabI2 protein. Red arrow indicates the chromatogram peak corresponding to desired fusion protein (B) FabI2 protein was purified by affinity chromatography. Gel electrophoresis indicate the purity of FabI2 protein. Lane 1, standards; lane 2, uninduced *E. coli* DE3 cultures (+ve control) carrying FabL2 in pET-30b(+); lane 3, Uninduced *E. coli* DE3 cultures carrying FabI2 in pET-30b(+); Lane 4, *E. coli* DE3 cultures carrying FabL2 in pET-30b(+) 2 hours post IPTG (1 mM) induction; Lane 5, *E. coli* DE3 cultures carrying FabI2 in pET-30b(+) 2 hours post IPTG (1 mM) induction; lane 6, *E. coli* DE3 cultures carrying FabL2 in pET-30b(+) 4 hours post IPTG (1 mM) induction; Lane 7, *E. coli* DE3 cultures carrying FabI2 in pET-30b(+) 4 hours post IPTG (1 mM) induction; Lane 8 purified FabI2 (37.74 kDa) protein (cropped from a separate SDS gel picture and merged here). (C) Enzyme activity of the purified FabI2 protein in 100 mM sodium phosphate buffer (pH; 6.5-8). (D) Enzyme activity of the purified FabI2 protein in 100 mM sodium citrate buffer (pH; 3.2-6.2). Highest activity was observed at pH 7.0 in case of sodium phosphate buffer and at pH 6.2 for sodium citrate buffer. Orange bar represents enzyme unit (Unit/ml) of FabI2 and gray bar represents specific activity, whereas the blue bars represents change in absorbance per minute.

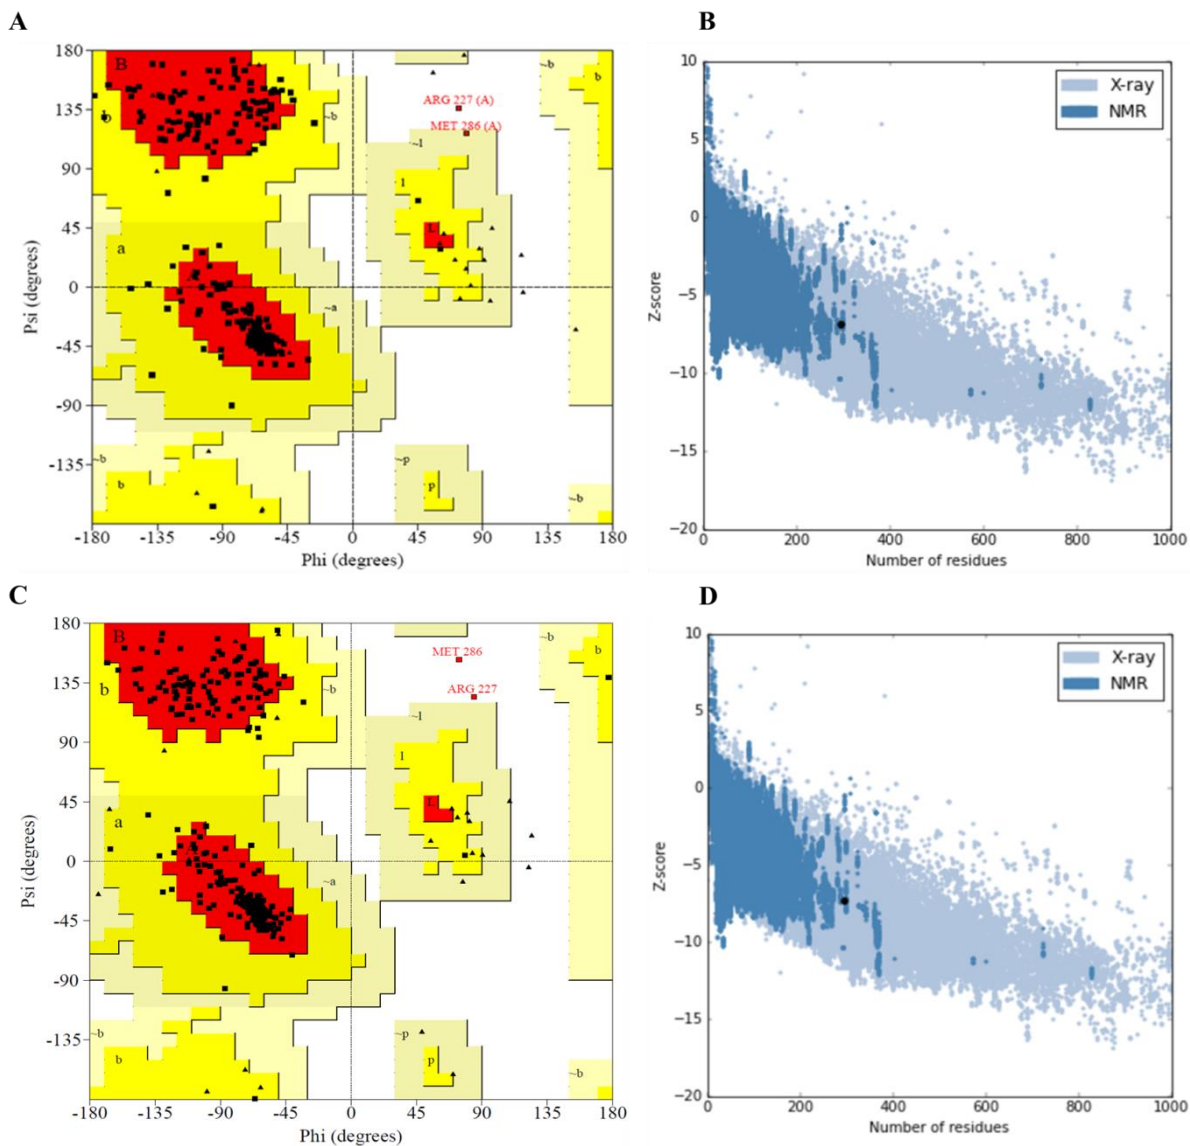

**Fig. S4. Validation of FabI2 and mFabI2 models.** Ramachandran plots of phi/psi ( $\Phi/\Psi$ ) distribution of homology models, calculated by PROCHECK, of (A) FabI2 and (C) mFabI2. The Z-score plot for modeled structures of (B) FabI2 and (D) mFabI2. Both the analyses suggested that modeled structures of FabI2 and mFabI2 were reasonably accurate and were within the range typically observed for native proteins of similar size.

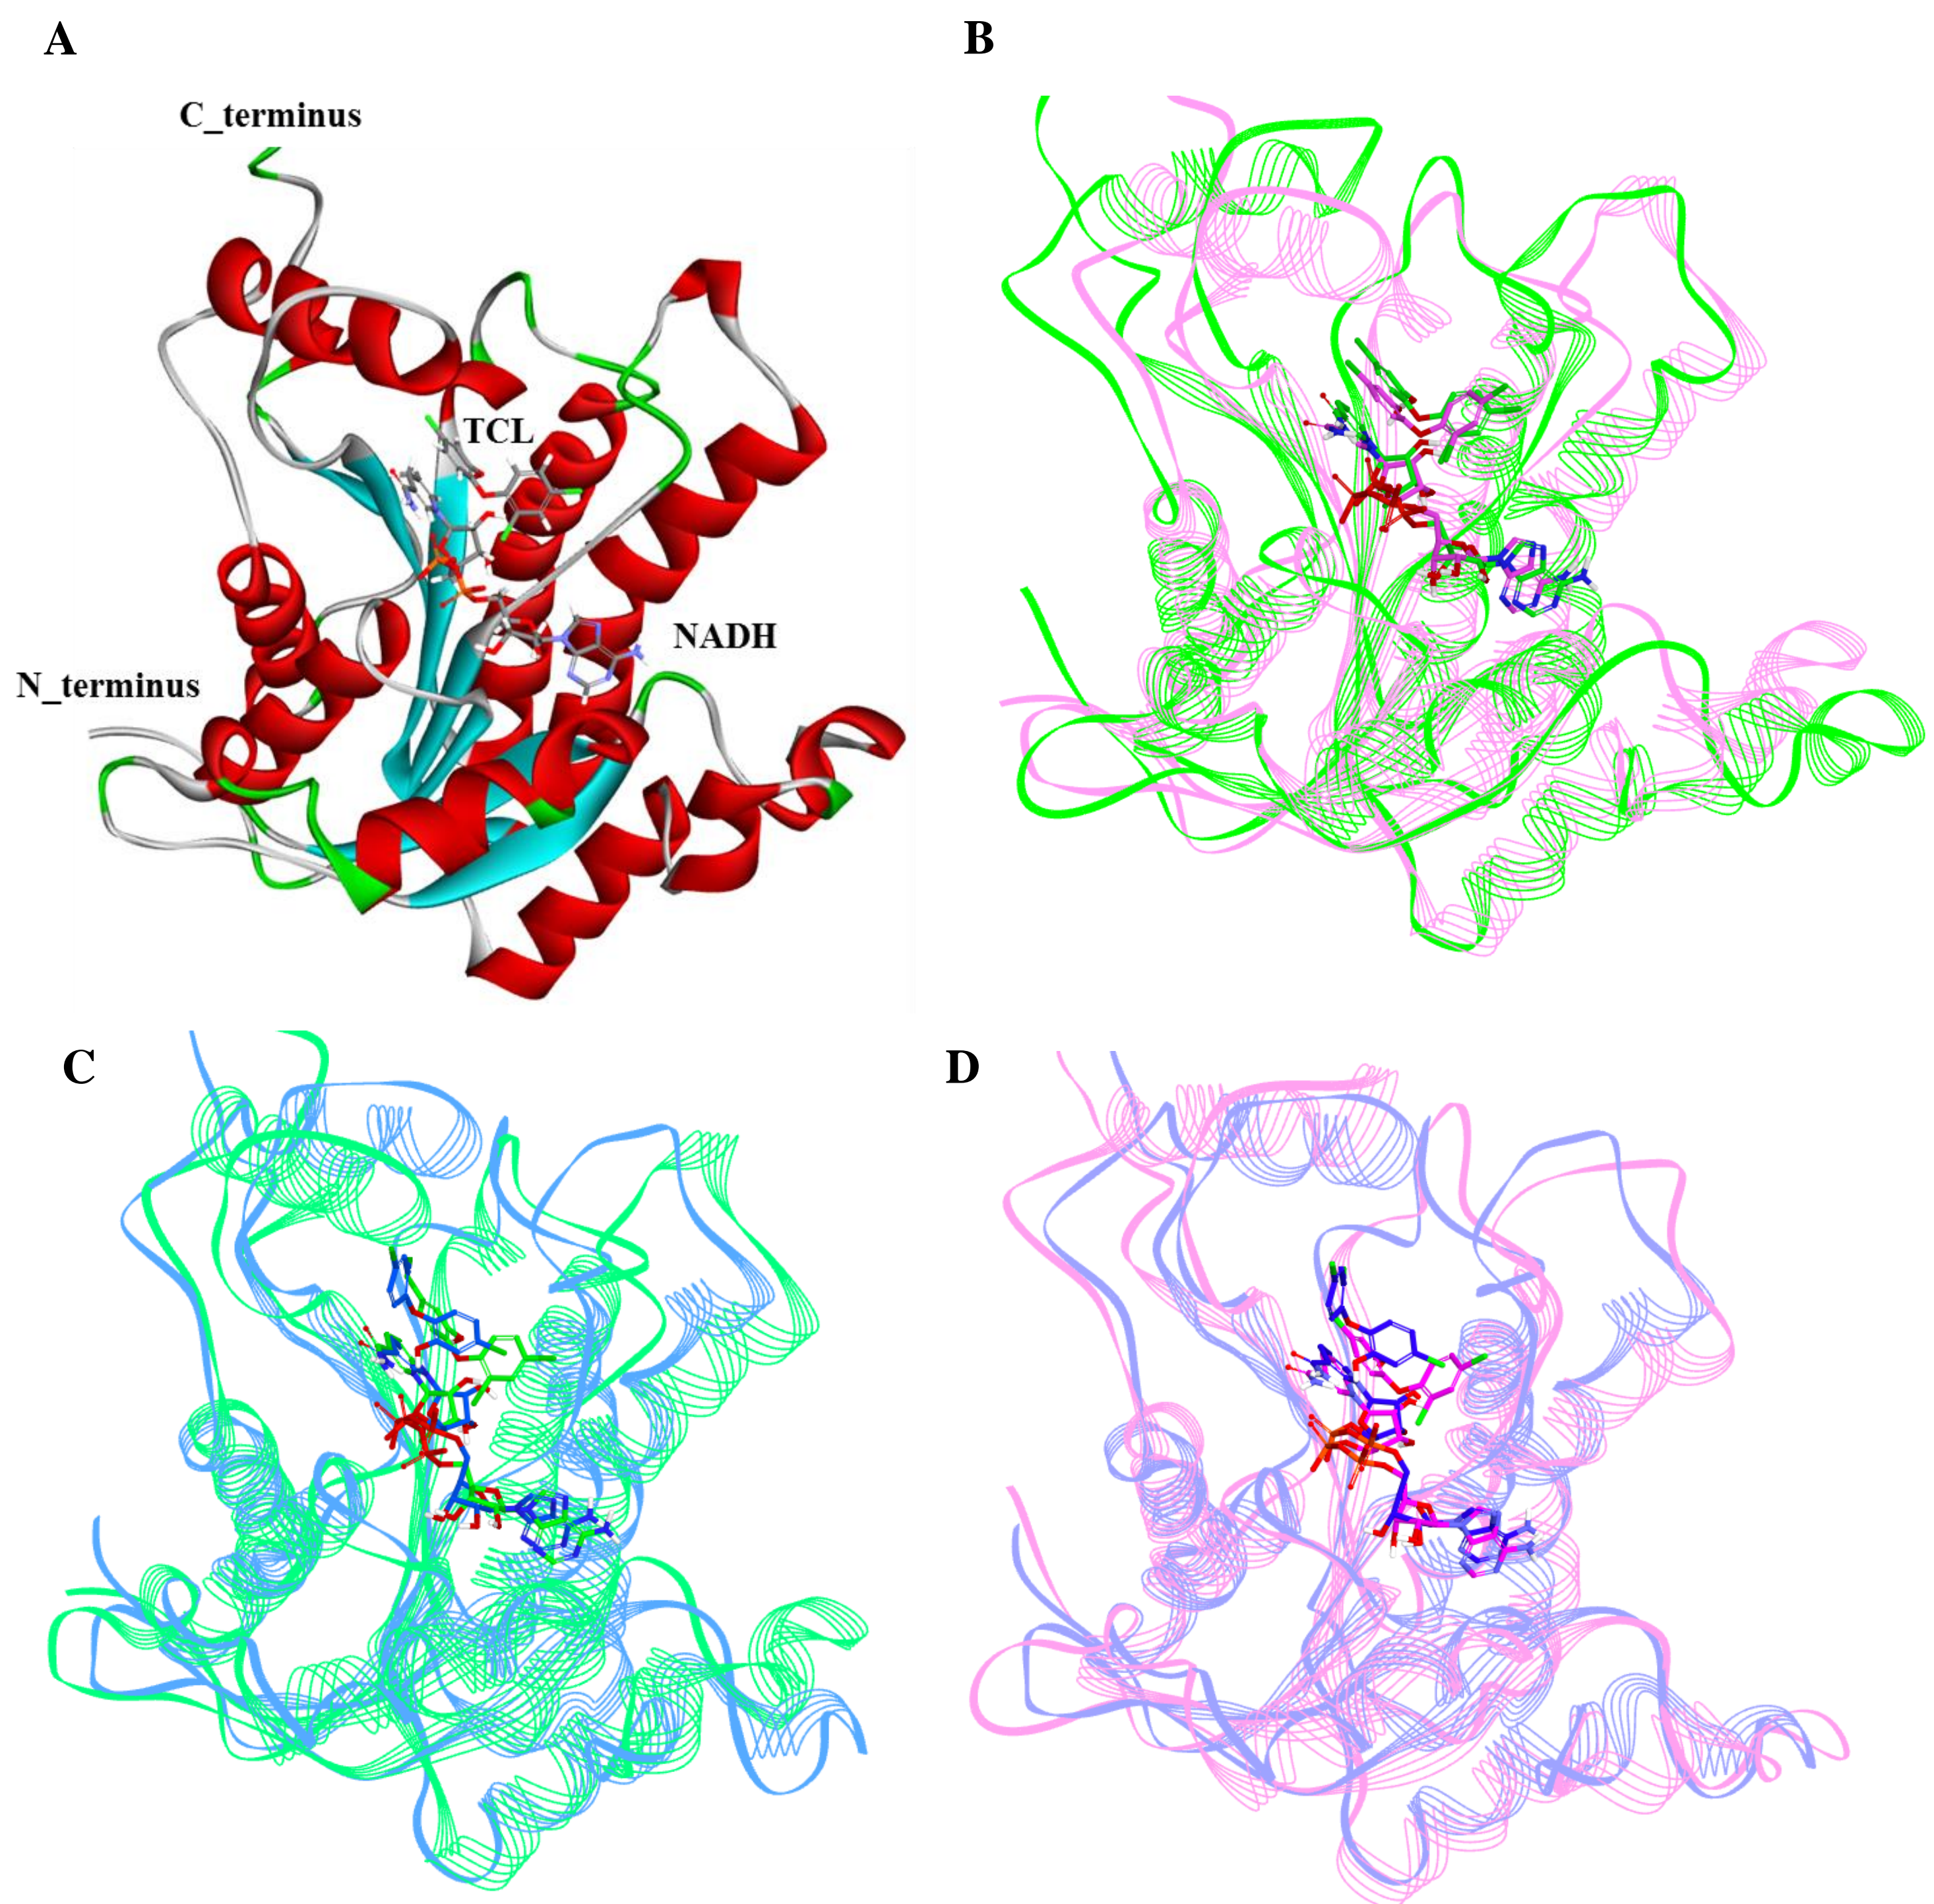

**Fig. S5. Structure of BnENR (template) and superimposition of BnENR, FabI2 and mFabI2.** (A) Crystal structure of *Brassica napus* Enoyl-acyl carrier protein reductase (BnENR, PDB ID: 1D7O) has been used as template for homology modeling of FabI2. NADH and TCL are depicted as sticks representations. (B) Superimposition of BnENR and FabI2 in complex with NADH and TCL. Structure of BnENR is shown as green wire representation, while FabI2 is depicted as magenta wire representation. Color scheme for NADH and TCL is tailing their respective protein partner and are shown as sticks representation. (C) Superimposition of BnENR and mFabI2 in complex with NADH and TCL. Structure of BnENR and its associated NADH and TCL is shown as green wire and sticks model, respectively. mFabI2 and its associated NADH and TCL are colored blue. (D) Superimposition of FabI2 and mFabI2 in complex with NADH and TCL. FabI2 and mFabI2 are depicted as wire representations, while NADH and TCL are shown as sticks. Magenta and blue colors reflect FabI2 and mFabI2, respectively.

# [Fig. S6, Raees Khan et al.]

|                   |                                                |                                                                    |                                                                   |
|-------------------|------------------------------------------------|--------------------------------------------------------------------|-------------------------------------------------------------------|
| FabI2             | HTISLTYMASEKAVPGYGG-GMSSAKAALESDNRVLAWEAGRK    | Metagenomic FabI2                                                  |                                                                   |
| Q9SLA8            | ASISLTYIASERIIPGYGG-GMSSAKAALESDTRVLAYEAGRK    | FabI2 homologues having<br>YX <sub>7</sub> K type catalytic domain |                                                                   |
| A0A061GSG8        | SSISLTYIASERIIPGYGG-GMSSAKAALESDTRVLAFEAGRK    |                                                                    |                                                                   |
| A0A0A0LXD8        | SSISLTYIASERIIPGYGG-GMSSAKAALESDTRVLAFEAGRK    |                                                                    |                                                                   |
| B8BXA1            | NMLSLTYIASSEKVIIPGYGG-GMSSAKAAQLESDTRTLAFEAGRK |                                                                    |                                                                   |
| B9T5D7            | SSISLTYIASERIIPGYGG-GMSSAKAALESDTRVLAFEAGRK    |                                                                    |                                                                   |
| U6GHH8            | AALALSYIASERVIIPGYGG-GMSSAKAALESDCRTLAFEAGRQ   |                                                                    |                                                                   |
| Q6X5U8            | SILSLTFIASERVVPGYGG-GMSSAKAAQLESDTKVLAWEAGRK   |                                                                    |                                                                   |
| Q6TEI5            | SVVSLTYQASQKVVPGYGG-GMSSAKAALESDTRVLAYYLGRK    |                                                                    |                                                                   |
| FabI              | ALLTLSYLGAERAI PNYN--VMGLAKASLEANVRYMANAMGPE   |                                                                    | Prototypic FabI                                                   |
| O67505            | AIVTLSYYGAEKVVPHYN--VMGIAKAALESTVRYLAYDIAKH    |                                                                    | FabI homologues having<br>YX <sub>6</sub> K type catalytic domain |
| C6J746            | SIMTMTYMGSERVMRNYN--VMGVAKAGLEASVRYLANDLGPK    |                                                                    |                                                                   |
| Q3A2X2            | SVLTMTYLGAQRAVPNYN--VMGVAKAALEASVRYLAAEVGSQ    |                                                                    |                                                                   |
| Q820V5            | GIVTTLTYLGSERAI PNYN--MMGIAKASLETAVKYLAFAELAAD |                                                                    |                                                                   |
| L0RE87            | SVMAMTYLGASKVITNYN--VMGVAKAALEASVRYLSSDMGSS    |                                                                    |                                                                   |
| Q81GI3            | NILTLTYLGCERVVKNYN--VMGVAKASLEASVKYLANDLGQH    |                                                                    |                                                                   |
| O24990            | SVLTLSYLGSTKYMAYN--VMGLAKAALESAVRYLAVDLGKH     |                                                                    |                                                                   |
| WP_037465251      | TIVTLTHMGSEKRVLPNYH--VMGVAKAGLESSIRYLANELGPA   |                                                                    |                                                                   |
| B9M6K7            | SILALTYYGQKVFPNYN--VMGVAKAALEMSIRYLAFAVGP      |                                                                    |                                                                   |
| P73016            | SIITLTYFGGVKVI PNYN--LMGVAKAGLEMTVRYLAAELGPQ   |                                                                    |                                                                   |
| FABL bas sub      | HIVSISSLGSI RYLENYT--TVGVSKAALEALTRYLAVELSPK   | Prototypic FabL                                                    |                                                                   |
| B3QVF0            | KIVALSSIGSLRCLPAYA--AVGTAKAGLEAMVKYLAVELGPK    | FabL homologues having<br>YX <sub>6</sub> K type catalytic domain  |                                                                   |
| A0A098G835        | RVVALSSLGASRAI PNYYA--FIGASKAALESLVRSLSLELAIY  |                                                                    |                                                                   |
| WP_038326851      | RIVAMSSLGAQRAMPHYG--FIGASKAALESLVRTLAQELGPR    |                                                                    |                                                                   |
| A0A098GBD7        | RVIALSSLGASRAI PNYYG--FIGASKAALEALVRSLSLELAEY  |                                                                    |                                                                   |
| WP_044743084      | KIVSISSLGSI RYLENYT--AVGVSKAALEALTRYLAVELAPK   |                                                                    |                                                                   |
| A0A0E0T904        | KIVSISSLGSI RYLENYT--AVGVSKAALEALTRYLAVELAPK   |                                                                    |                                                                   |
| WP_035487157      | AMLALSSFSGSERVFPYYT--SVGASKAALEALVRYLAVELAPR   |                                                                    |                                                                   |
| J9HD84            | AMLALSSFSGADRVPYYV--SVGSSKAALESLVRYFAIELAPR    |                                                                    |                                                                   |
| WP_028582575      | RIITISSLGSVRALPDYT--AVGASKAALESLVRHLAVELGPK    |                                                                    |                                                                   |
| W7B1Y2            | KIIGVSSIGAIRYLENYT--TVGVSKAAVEALTRYLAVELAPL    |                                                                    |                                                                   |
| FabL2             | AVVTMSSTGNLIYIENYA--GHGINKAAVEAMSRYAAREL GEM   | Prototypic FabL2                                                   |                                                                   |
| CJ-lab7alpha      | SIISISSTGNLVYIENYS--GHGTAKAAVEAMARYAATELG EK   | FabL2 homologues having<br>YX <sub>6</sub> K type catalytic domain |                                                                   |
| HPLAB-7ALP        | AIVSLSSTGNLVYMPNYA--GHGNSKNAVETMVKYAAVDLGEF    |                                                                    |                                                                   |
| Q17WU6            | AIVSLSSTGNLVYMPNYA--GHGNSKNAIETMVKYAAVDLGEF    |                                                                    |                                                                   |
| I0ETE1            | AIVSLSSTGNLVYMPNYA--GHGNSKNAVETMVKYAATDLGEF    |                                                                    |                                                                   |
| T2SLB2            | AIVSLSSTGNLVYMPNYA--GHGNSKNAVE-----            |                                                                    |                                                                   |
| WP_029520276      | KIIAISSTGTRDYMPNYA--IHGAASKALEALVRYAAVEFGPK    |                                                                    |                                                                   |
| WP_029523144      | KIIAISSTGTRDYMPNYA--IHGAASKALEALVRYAAVEFGPK    |                                                                    |                                                                   |
| FabV Vib Albensis | KTVAYSYIGTELTWPIYWDGALGRAKMDLDRAATALNEKLAAK    |                                                                    | Prototypic FabV                                                   |
| A0A0H6Q9B8        | KTVAYSYIGTELTWPIYWDGALGRAKMDLDRAATALNEKLAAK    |                                                                    | FabV homologues having<br>YX <sub>8</sub> K type catalytic domain |
| Q2P9J6            | RSVAFSYIGTEITWPIYWHGALGKAKVDLDRTAQRLNARLAKH    |                                                                    |                                                                   |
| A0A160SZK9        | KTISYSYIGTISITWPIYRHGTLGKAKEHLENTAKNINKKLFEN   |                                                                    |                                                                   |
| Q62L02            | KTTAFTYLGQVTHDIYWNGSIGEAKKDLDRTVLALRGKLAAR     |                                                                    |                                                                   |
| H9UIZ3            | VTLALS YIGPEITTA VYRDGTIGQAKKHLEKTAHSLSESLKDI  |                                                                    |                                                                   |
| A0A098G1G8        | ITVAYSYIGPPVSHAIYKDGTIGKAKEHLQQTAKHLNQLKLEKI   |                                                                    |                                                                   |
| Q73Q47            | ITLAYS YIGPEATQALYRKGTIGKAKEHLEATAHRLNKENPSI   |                                                                    |                                                                   |
| Q6LP67            | KTVAYSYVGP KATYSIYHQGTIGRAK AHLHATADQLNDKMSEM  |                                                                    |                                                                   |
| A0A143XGL5        | RTVAYSYIGPEMTPYIYTEGTIGQAKQHLYHTALQLN--AEGI    |                                                                    |                                                                   |

**Fig. S6. The YX<sub>7</sub>K catalytic domain was unique to metagenomic FabI2 ENR and its homologs from UniRef50**

**database.** Multiple alignment (partial) of metagenomic FabI2 ENR and its homologs with prototypic well characterized ENRs and their homologs from UniRef50 database. The YX<sub>7</sub>K catalytic domain (boxed in red) was unique to FabI2 ENR and was strictly conserved among its homologs. On the other hand, other prototypic ENRs has different catalytic domains; FabI (YX<sub>6</sub>K type, boxed in green ), FabL (YX<sub>6</sub>K type, boxed in dark yellow ), FabL2 (YX<sub>6</sub>K type, boxed in dark brown ), and FabV, (YX<sub>8</sub>K type, boxed in cyan).

|                | 310                                   | 320     | 330   | 340   | 350 |
|----------------|---------------------------------------|---------|-------|-------|-----|
| FabI2          | MNAGGSTISLTYMASEKAVPGYGGGMSSAKAALES   | DNRVLAW | EAGRK | WGW   |     |
| WP 032125249.1 | LNAGGSALSILTYLASEKIIPGYGGGMSSAKAALES  | DTRTLAW | EAGRK | WWS   |     |
| WP 059060327.1 | LNAGGSALSILTYLASEKIIPGYGGGMSSAKAALES  | DTRTLAW | EAGRK | WWS   |     |
| AUX13448.1 eno | MSDGGSAINLTYLASERAVPGYGGGMSSAKAALES   | DTRTLAW | EAGRK | WVN   |     |
| OGN58662.1 eno | MPALGASLSLSYIASERAIPGYGGGMSSAKAALES   | DTRTLAF | EAGRK | WVG   |     |
| OGN53367.1 eno | MPALGASLSLSYIASERAIPGYGGGMSSAKAALES   | DTRTLAF | EAGRK | WVG   |     |
| PIS02783.1 eno | MNQGGSVLSLTYIASERVIPGYGGGMSSAKAALES   | DTRTLAW | EAGRK | WVN   |     |
| OJV07209.1 eno | MNPGGATLSLTYIASERKAIPGYGGGMSSAKAALES  | DTRSLAW | EAGRK | WVN   |     |
| WP 041418840.1 | MPPGSSALNLTLYLASERAVPGYGGGMSSAKAALES  | DTRTLAW | EVGRK | WVG   |     |
| CCB88976.1 eno | MPPGSSALNLTLYLASERAVPGYGGGMSSAKAALES  | DTRTLAW | EVGRK | WVG   |     |
| WP 042239046.1 | INAGGATLSLTYIASERKAIPGYGGGMSSAKAALES  | DTRTLAW | EAGRK | WVN   |     |
| WP 044882332.1 | INAGGATLSLTYIASERKAIPGYGGGMSSAKAALES  | DTRTLAW | EAGRK | WVN   |     |
| KIC73781.1 Eno | INAGGATLSLTYIASERKAIPGYGGGMSSAKAALES  | DTRTLAW | EAGRK | WVN   |     |
| WP 039384665.1 | INAGGATLSLTYIASERKAIPGYGGGMSSAKAALES  | DTRTLAW | EAGRK | WVN   |     |
| OGN63603.1 eno | MNEGGSVLSLTYIASVRAIPGYGGGMSSAKAALES   | DTRTLAW | EAGRK | WVK   |     |
| WP 042103672.1 | MPPGSSCISLTYIAAEKVIPGYGGGMSSAKAALES   | DTQVLA  | FEAGR | KWN   |     |
| WP 088245030.1 | MREGGSVLSLTYLASERVVPGYGGGMSSAKAALES   | DTRTLAW | EAGRK | WVG   |     |
| PCI94168.1 eno | MSHGGSCLTLYIASERAVPGYGGGMSSAKAALES    | DTRTLAF | EAGRK | WVG   |     |
| WP 013925330.1 | MNAGGSTLSLTYIASERKAIPGYGGGMSSAKAALES  | DTRTLAW | EAGRK | WVN   |     |
| WP 006339971.1 | MNAGGSTLSLTYIASERKAIPGYGGGMSSAKAALES  | DTRTLAW | EAGRK | WVN   |     |
| OGN56192.1 eno | MNEGGAAALCLTYIASERAIPSYGGGMSSAKAALES  | DTRTLAW | EAGRK | WVN   |     |
| CCB91849.1 Eno | MNAGGSAISLTYFASERAVPGYGGGMSSAKAALES   | DTRILSW | EAGRK | WVK   |     |
| WP 013181731.1 | MNAGGSAISLTYFASERAVPGYGGGMSSAKAALES   | DTRILSW | EAGRK | WVK   |     |
| GAQ86187.1 Pla | MTQGGATVSLTYFASEKVIPGYGGGMSSAKAALES   | DTQVLA  | W     | EAGRK | YVG |
| ABK25822.1 unk | MNPGGSTISLTYIASERIIIPGYGGGMSSAKAALES  | DTRVLA  | FEAGR | RRYN  |     |
| CDZ80974.1 Eno | MNEGAATISLTYAASEKAIPGYGGGMSSAKAALES   | DTRVLA  | YEAPR | KFG   |     |
| PNR39341.1 hyp | MNPGGSSLSLTYVASEEQIIPGYGGGMSSAKAALES  | DTRVLA  | FEVGR | KYV   |     |
| CDP10132.1 unn | MNPGGATISLTYIASERIIIPGYGGGMSSAKAALES  | DTRVLA  | FEAGR | KHR   |     |
| XP 015898944.1 | INPGGATISLTYIASERTIPGYGGGMSSAKAALES   | DTRVLA  | FEAGR | KHK   |     |
| AMY26635.1 red | MNPGGATISLTYLASEKIIPGYGGGMSSAKAALES   | DTRVLA  | FEAGR | KHN   |     |
| XP 001768068.1 | MNPGGSSLSLTYVASEEQIIPGYGGGMSSAKAALES  | DTRVLA  | FEVGR | KYV   |     |
| XP 022020754.1 | MNRRGGATISLTYIASERIIIPGYGGGMSSAKAALES | DTQVLA  | FEAGR | KHG   |     |
| XP 023914015.1 | MNPGGASISLTYIASERIIIPGYGGGMSSAKAALES  | DTQVLA  | FEAGR | KHK   |     |
| WP 013712757.1 | MNSGGCTISLTYLASMRAVPGYGGGMSSAKAALES   | DTKTLAW | EAGR  | RWN   |     |
| PON52209.1 Glu | MNPGGASISLTYIASERKIIPGYGGGMSSAKAALES  | DTRVLA  | FEAGR | KHK   |     |
| WP 021756559.1 | MNSGGCTISLTYLASMRAVPGYGGGMSSAKAALES   | DTKTLAW | EAGR  | RWN   |     |
| POF25828.1 eno | MNPGGASISLTYIASERIIIPGYGGGMSSAKAALES  | DTQVLA  | FEAGR | KHK   |     |
| ACZ06071.1 eno | MNPGGSSISLTYIASERKIIPGYGGGMSSAKAALES  | DTRVLA  | FEAGR | KRK   |     |
| XP 004142140.1 | INPGGSSLSLTYIASERIIIPGYGGGMSSAKAALES  | DTRVLA  | FEAGR | KHK   |     |
| WP 063329268.1 | MNSGGCTISLTYLASMRAVPGYGGGMSSAKAALES   | DTKTLAW | EAGR  | RWN   |     |
| PON81019.1 Glu | MNPGGASISLTYIASERKIIPGYGGGMSSAKAALES  | DTRVLA  | FEAGR | KHK   |     |
| XP 017623717.1 | MNPGGSSISLTYIASERVIPGYGGGMSSAKAALES   | DTRVLA  | FEAGR | KHK   |     |
| AJQ20621.1 Eno | INPGGSSISLTYIASERIIIPGYGGGMSSAKAALES  | DTRVLA  | FEAGR | KHK   |     |
| XP 008449761.1 | INPGGSSLSLTYIASERIIIPGYGGGMSSAKAALES  | DTRVLA  | FEAGR | KHK   |     |
| XP 022944685.1 | INPGGSSLSLTYIASERIIIPGYGGGMSSAKAALES  | DTRVLA  | FEAGR | KHK   |     |
| XP 017430721.1 | LNPGGSSISLTYIASERIIIPGYGGGMSSAKAALES  | DTRVLA  | FEAGR | KRK   |     |
| ACJ07149.1 eno | MNPGGSSISLTYIASERKIIPGYGGGMSSAKAALES  | DTRVLA  | FEAGR | KRK   |     |
| XP 012472974.1 | MNPGGSSISLTYIASERIIIPGYGGGMSSAKAALES  | DTRVLA  | FEAGR | KHK   |     |
| XP 014502579.1 | LNPGGSSISLTYIASERIIIPGYGGGMSSAKAALES  | DTRVLA  | FEAGR | KRK   |     |
| KTF28607.1 eno | MNSGGCTISLTYLASMRAVPGYGGGMSSAKAALES   | DTKTLAW | EAGR  | RWN   |     |
| XP 006660484.1 | MNPGGATISLTYIASERTIPGYGGGMSSAKAALES   | DTRVLA  | YEAGR | KGK   |     |
| WP 098038283.1 | MPPGSSLTLTYLAAQRAIPGYGGGMSSAKAALES    | DTKTLAW | EAGR  | KWG   |     |
| XP 011078829.1 | MNPGGATISLTYIASERKIIPGYGGGMSSAKAALES  | DTKVLAF | FEAGR | KHN   |     |
| XP 017433127.1 | LNPGGSSISLTYIASERIIIPGYGGGMSSAKAALES  | DTRVLA  | FEAGR | KRK   |     |
| ACJ07148.1 eno | MNPGGSSISLTYIASERKIIPGYGGGMSSAKAALES  | DTRVLA  | FEAGR | KRK   |     |
| WP 100934847.1 | MNRRGGSTISLTYLASMRAVPGYGGGMSSAKAALES  | DTKTLAW | EAGR  | RWG   |     |
| XP 019450932.1 | LNPGGASISLTYIASERIIIPGYGGGMSSAKAALES  | DTRVLA  | FEAGR | KRK   |     |
| WP 068470377.1 | MNPHGSALSILTYLASERVIPGYGGGMSSAKAALES  | DTQTLAW | EAGR  | KWN   |     |
| XP 022985712.1 | INPGGSSLSLTYIASERIIIPGYGGGMSSAKAALES  | DTRVLA  | FEAGR | KHK   |     |
| KZN26630.1 eno | MNSGGCTISLTYLASMRAVPGYGGGMSSAKAALES   | DTKTLAW | EAGR  | RWN   |     |
| XP 023513365.1 | INPGGSSLSLTYIASERIIIPGYGGGMSSAKAALES  | DTRVLA  | FEAGR | KHK   |     |
| XP 010265894.1 | MNPGGSAISLTYIASERIIIPGYGGGMSSAKAALES  | DTRVLA  | FEAGR | KHK   |     |
| WP 011175702.1 | LNSQGSALTLYLASEKIIPGYGGGMSSAKAALES    | DTRTLAW | EAGR  | KWN   |     |
| XP 022154116.1 | MNPGGSSISLTYIASERIIIPGYGGGMSSAKAALES  | DTRVLA  | FEAGR | KNK   |     |
| WP 010883049.1 | MNRRGGSTISLTYLASMRAVPGYGGGMSSAKAALES  | DTKTLAW | EAGR  | RWG   |     |
| XP 009348968.1 | MNPGGASLSLTYIASERIIIPGYGGGMSSAKAALES  | DTRVLA  | FEAGR | KHN   |     |
| WP 080126519.1 | MNEGASTISLTYLASTRAVPGYGGGMSSAKAALES   | DTKVLAW | EAGR  | RWG   |     |
| XP 009348967.1 | MNPGGASLSLTYIASERIIIPGYGGGMSSAKAALES  | DTRVLA  | FEAGR | KHN   |     |
| XP 014493530.1 | LNPGGSSISLTYIASERIIIPGYGGGMSSAKAALES  | DTRVLA  | FEAGR | KRK   |     |
| BAT81583.1 hyp | LNPGGSSISLTYIASERIIIPGYGGGMSSAKAALES  | DTRVLA  | FEAGR | KRK   |     |
| WP 035405642.1 | MNEGASTISLTYLASMRAVPGYGGGMSSAKAALES   | DTKVLAW | EAGR  | RWG   |     |
| WP 080124232.1 | MNEGASTISLTYLASMRAVPGYGGGMSSAKAALES   | DTKVLAW | EAGR  | RWG   |     |
| XP 009369620.1 | MNPGGASLSLTYIASERIIIPGYGGGMSSAKAALES  | DTRVLA  | FEAGR | KHN   |     |
| ADV16377.1 eno | MNPGGASISLTYIASERIIIPGYGGGMSSAKAALES  | DTQVLA  | FEAGR | KHG   |     |
| KZV36401.1 NAD | MNPGGSTISLTYIASERIIIPGYGGGMSSAKAALES  | DTRVLA  | FEAGR | KHN   |     |
| XP 008387259.1 | MNPGGASLSLTYIASERIIIPGYGGGMSSAKAALES  | DTRVLA  | FEAGR | KHN   |     |
| XP 011025228.1 | MNRRGGSSISLTYIASERIIIPGYGGGMSSAKAALES | DTRVLA  | FEAGR | KNR   |     |
| XP 008367361.1 | MNPGGASLSLTYIASERIIIPGYGGGMSSAKAALES  | DTRVLA  | FEAGR | KHN   |     |
| WP 010230294.1 | MNEGASTISLTYLASMRAVPGYGGGMSSAKAALES   | DTKVLAW | EAGR  | RWG   |     |
| WP 009873559.1 | MNAGASTISLTYLASMRAVPGYGGGMSSAKAALES   | DTKVLAW | EAGR  | RWG   |     |
| XP 022859433.1 | MNPGGSSISLTYIASERIIIPGYGGGMSSAKAALES  | DTRVLA  | FEAGR | KHK   |     |
| WP 080124763.1 | MNEGASTISLTYLASTRAVPGYGGGMSSAKAALES   | DTKVLAW | EAGR  | RWG   |     |
| XP 011015301.1 | MNRRGGSSISLTYIASERIIIPGYGGGMSSAKAALES | DTRVLA  | FEAGR | KNR   |     |
| XP 022018336.1 | MNPGGASISLTYIASERIIIPGYGGGMSSAKAALES  | DTQVLA  | FEAGR | KHG   |     |
| AMY26631.1 red | MNPGGATISLTYIASERIIIPGYGGGMSSAKAALES  | DTRVLA  | FEAGR | KHK   |     |
| PNT46771.1 hyp | MNPGGSSISLTYIASERIIIPGYGGGMSSAKAALES  | DTRVLA  | FEAGR | KNR   |     |
| XP 002297662.2 | MNPGGSSISLTYIASERIIIPGYGGGMSSAKAALES  | DTRVLA  | FEAGR | KNR   |     |
| XP 008350273.1 | MNPGGASLSLTYIASERIIIPGYGGGMSSAKAALES  | DTRVLA  | FEAGR | KHN   |     |
| XP 021621700.1 | MNPGGSSISLTYIASERIIIPGYGGGMSSAKAALES  | DTRVLA  | FEAGR | KHK   |     |
| NP 001280885.1 | MNPGGASLSLTYIASERIIIPGYGGGMSSAKAALES  | DTRVLA  | FEAGR | KHN   |     |
| XP 011037915.1 | MNPGGSSISLTYIASERIIIPGYGGGMSSAKAALES  | DTRVLA  | FEAGR | KNR   |     |
| WP 080122016.1 | MNEGASTISLTYLASTRAVPGYGGGMSSAKAALES   | DTKVLAW | EAGR  | RWG   |     |
| WP 011006351.1 | MHPGGSSISLTYLASSRAVPGYGGGMSSAKAALES   | DTKMLAW | EAGR  | KWG   |     |
| XP 002304026.1 | MNPGGSSISLTYIASERIIIPGYGGGMSSAKAALES  | DTRVLA  | FEAGR | KNR   |     |
| WP 080127032.1 | MNEGASTISLTYLASMRAVPGYGGGMSSAKAALES   | DTKVLAW | EAGR  | RWG   |     |
| XP 009376124.1 | MKPGGASLSLTYIASERIIIPGYGGGMSSAKAALES  | DTRVLA  | FEAGR | KHN   |     |
| WP 080128631.1 | MNEGASTISLTYLASMRAVPGYGGGMSSAKAALES   | DTKVLAW | EAGR  | RWG   |     |
| XP 004304370.1 | MNPGGASISLTYIASERIIIPGYGGGMSSAKAALES  | DTRVLA  | FEAGR | KHR   |     |
| XP 021830626.1 | INPGGASISLTYIASERIIIPGYGGGMSSAKAALES  | DTRVLA  | FEAGR | KHN   |     |

**Fig. S7. The YX<sub>7</sub>K catalytic domain was unique to metagenomic FabI2 ENR and its top 100 homologs from NCBI database. Multiple alignment (partial) of metagenomic FabI2 ENR and its homologs (see supplementary data 1 for the details) with best hits from NCBI database. The YX<sub>7</sub>K catalytic domain (boxed in red) was unique to FabI2 ENR and was strictly conserved among its homologs.**



[Fig. S8, Raees Khan et al.]

|                         |                                   |             |                                                                           |                                                                    |
|-------------------------|-----------------------------------|-------------|---------------------------------------------------------------------------|--------------------------------------------------------------------|
| 1. pAF1 5 yx7k          | YMASEKAVPG - YGGGMSSAKAALES       | SDNRVLA     | Metagenomic FabI2                                                         |                                                                    |
| 2. UniRef50 A0A061GSG8  | YIASERIIIPG - YGGGMSSAKAALES      | SDTRVLA     |                                                                           |                                                                    |
| 3. UniRef50 A0A0A0LXD8  | YIASERIIIPG - YGGGMSSAKAALES      | SDTRVLA     | Uniref 50 FabI2 homologues having YX <sub>7</sub> K type catalytic domain |                                                                    |
| 4. UniRef50 A0A0S3G5D1  | YLASERVIIPG - YGGGMSSAKAALES      | SDTKVLA     |                                                                           |                                                                    |
| 5. UniRef50 A0A142XNM6  | YVAGERVVPH - YGGGMGTCKAALQMDAKQLS |             |                                                                           |                                                                    |
| 6. UniRef50 B8BXA1      | YIASEKVIIPG - YGGGMSSAKAAQLES     | SDTRTLA     |                                                                           |                                                                    |
| 7. UniRef50 Q9SLA8      | YIASERIIIPG - YGGGMSSAKAALES      | SDTRVLA     |                                                                           |                                                                    |
| 8. UniRef50 B9T5D7      | YIASERIIIPG - YGGGMSSAKAALES      | SDTRVLA     |                                                                           |                                                                    |
| 9. UniRef50 FOVRC4      | EYWSSALIPVG - YGGGMSSAKAALES      | SDTRTLA     |                                                                           |                                                                    |
| 10. UniRef50 Q6TEI5     | YQASQKVVPG - YGGGMSSAKAALES       | SDTRVLA     |                                                                           |                                                                    |
| 11. UniRef50 Q6X5U8     | FIASERVVPG - YGGGMSSAKAAQLES      | SDTKVLA     |                                                                           |                                                                    |
| 12. UniRef50 U6GHH8     | YIASERVIIPG - YGGGMSSAKAALES      | SDCRTLA     |                                                                           |                                                                    |
| 13. UniRef50 Q6Z0I4     | YIASERAIPG - YGGGMSSAKAALES       | SDTKVLA     |                                                                           |                                                                    |
| 14. UniRef50 A0A067CC20 | YLGAVKAI PN - YN - IMGPAKAALE     | EATCRALA    |                                                                           | Uniref 50 FabI2 homologues YX <sub>6</sub> K type catalytic domain |
| 15. UniRef50 A0A068NVM5 | YLGSTRAMKN - YN - VMGVCKAALE      | EASVRYLA    |                                                                           |                                                                    |
| 16. UniRef50 A0A098G8M8 | YYGSQKVILN - YN - LMGVVKAALE      | EASVRYLA    |                                                                           |                                                                    |
| 17. UniRef50 A0A0F6A7R7 | YLGSERAVQN - YN - VMGPVK          | SALDSSVRYLA |                                                                           |                                                                    |
| 18. UniRef50 A0A0S4PDV7 | YLGSERVVPG - YN - VMGVAKAALE      | EASVRYLA    |                                                                           |                                                                    |
| 19. UniRef50 A0A0U5BK22 | YYGSEKVV TN - YN - VMGVAKAALE     | ESSIRYLA    |                                                                           |                                                                    |
| 20. UniRef50 A0A0W0WIB4 | YYGAEKVIKN - YN - LMGPVKAALE      | EASVRYLA    |                                                                           |                                                                    |
| 21. UniRef50 A0A142WRH8 | YLGGEKVI PG - YN - LMGLCK         | SALESATEYCA |                                                                           |                                                                    |
| 22. UniRef50 A0A167IRJ7 | YLGSQRAIQN - YN - VMGPVK          | SALDSSVRYLA |                                                                           |                                                                    |
| 23. UniRef50 A0A177W1C0 | YLGAQKVMQN - YN - MMGPIKAALE      | EASIKYLA    |                                                                           |                                                                    |
| 24. UniRef50 A0A1C7PE22 | YLGAEKVV PN - YN - LMGVSKAALE     | EATTRYLA    |                                                                           |                                                                    |
| 25. UniRef50 A0A1E5GRH2 | YLGSERAIPN - YN - MMGIKAA         | SLETAVKYLA  |                                                                           |                                                                    |
| 26. UniRef50 A0A1F3SNZ3 | YLGGRVLP G - YG - IMGPAKAALE      | SCVRYLS     |                                                                           |                                                                    |
| 27. UniRef50 A0A1F3VNS9 | YHGSQKVLKG - YN - VMGSAKAALE      | SAIRYLA     |                                                                           |                                                                    |
| 28. UniRef50 A0A1F8SC12 | YYGAEKVV TH - YN - VMGVAKAALE     | EASVRYLA    |                                                                           |                                                                    |
| 29. UniRef50 A0A1F9KZF7 | HEGSRRAVPG - YC - TMGVAKAALE      | ESTVRYLA    |                                                                           |                                                                    |
| 30. UniRef50 A0A1G3LCV0 | YIGSIKALPS - YN - AMGVAKAALE      | SAVRYLA     |                                                                           |                                                                    |
| 31. UniRef50 A0A1J5F0K6 | YLGATAVVQN - YN - VMGVAKAALE      | SCVRYLA     |                                                                           |                                                                    |
| 32. UniRef50 A0A1Q3SQ15 | FHGSQKIVEH - YN - LMGPVKAALE      | SAVRYMA     |                                                                           |                                                                    |
| 33. UniRef50 A1K7E2     | YLGSEKVI PH - YG - VMGLCKAALE     | EATRYMA     |                                                                           |                                                                    |
| 34. UniRef50 A4Z1H2     | YYGADKVV NN - YN - IMGLAKAALE     | EASVRYLA    |                                                                           |                                                                    |
| 35. UniRef50 A6DIN9     | YLGSERICTN - YN - VMGVAKAALE      | GLECSTRYLA  |                                                                           |                                                                    |
| 36. UniRef50 B3DWM4     | YYGSEKVISN - YK - IMGPAKAALE      | ESTVRYLA    |                                                                           |                                                                    |
| 37. UniRef50 C1CY09     | YHASQQVVPK - YN - VMGVAKAALE      | EATRYLA     |                                                                           |                                                                    |
| 38. UniRef50 C6XEY3     | YGGSMRVV PN - YN - AMAPAK         | SALESSTKYLA |                                                                           |                                                                    |
| 39. UniRef50 D8IVG6     | YIGAEEVV VN - YG - VMGPVKAALE     | SAVRYLA     |                                                                           |                                                                    |
| 40. UniRef50 E0I8M3     | YLGSNRVCAG - YN - VLGIAK          | SALETTCKYLA |                                                                           |                                                                    |
| 41. UniRef50 E0XQH6     | YAASNRFVPS - YG - IMSMAKAALE      | ECWTRELA    |                                                                           |                                                                    |
| 42. UniRef50 G7Q4C7     | YYGSGRVV AN - YN - AMGVAK         | SALEASVRYLA |                                                                           |                                                                    |
| 43. UniRef50 G8NCG2     | YYASEKVV PK - YN - VMATAKAALE     | EASVRYLA    |                                                                           |                                                                    |
| 44. UniRef50 I0IG62     | YYGGEKVA PG - YN - VMGVAK         | ACLEHTTRYLA |                                                                           |                                                                    |
| 45. UniRef50 I0IPP1     | YLGSERVV PH - YN - VMGVAKAALE     | SAVRYLA     |                                                                           |                                                                    |
| 46. UniRef50 I5BTJ8     | YYGAEKVM PH - YN - VMGVAKAALE     | EASVRYLA    |                                                                           |                                                                    |
| 47. UniRef50 K0ABY2     | YLGGEKMPV PN - YN - VMGVAK        | AALDASVRYLA |                                                                           |                                                                    |
| 48. UniRef50 M1X3I0     | YLGSI RAVPN - YN - IMGVAKAALE     | EASVRYLA    |                                                                           |                                                                    |
| 49. UniRef50 N9WGL0     | YLGSERVIPN - YN - VMGVAKAALE      | EASVRYLA    |                                                                           |                                                                    |
| 50. UniRef50 O67505     | YYGAEKVV PH - YN - VMGIKAALE      | ESTVRYLA    |                                                                           |                                                                    |
| 51. UniRef50 P54616     | YLGGE LVPN - YN - VMGVAK          | ASLDASVKYLA |                                                                           |                                                                    |
| 52. UniRef50 P73016     | YFGGVKVI PN - YN - LMGVAKAALE     | GLEMTVRYLA  |                                                                           |                                                                    |
| 53. UniRef50 Q05069     | YLCGVRAV PN - YN - VMGVAKAALE     | EASVRYLA    |                                                                           |                                                                    |
| 54. UniRef50 Q1LQX5     | YDGANRVV PN - YD - LMGPVKAALE     | ASCRYLA     |                                                                           |                                                                    |
| 55. UniRef50 Q1RH28     | YYGAEKVI PN - YN - VMGVAKAALE     | EASVRYLA    |                                                                           |                                                                    |
| 56. UniRef50 Q2BKW9     | YLGSA LATGD - YN - IMGCAKAALE     | EATRYLA     |                                                                           |                                                                    |
| 57. UniRef50 Q2FZQ3     | YLGGEFAVQN - YN - VMGVAKAALE      | ANVKYLA     |                                                                           |                                                                    |
| 58. UniRef50 Q3A2X2     | YLGAQRAV PN - YN - VMGVAKAALE     | EASVRYLA    |                                                                           |                                                                    |
| 59. UniRef50 Q7UK85     | YYGGEKCV PG - YN - VMGVCK         | AALDASMRVLA |                                                                           |                                                                    |
| 60. UniRef50 Q81GI3     | YLGGERVVKN - YN - VMGVAKAALE      | ASVVKYLA    |                                                                           |                                                                    |

Fig. S8. The YX<sub>7</sub>K catalytic domain was unique to metagenomic FabI2 ENR and its closely related homologs from UniRef50 database. Multiple alignment (partially shown) of metagenomic FabI2 ENR and its homologs with best hits from UniRef50 database. The YX<sub>7</sub>K catalytic domain (boxed in red) was unique to FabI2 ENR and was strictly conserved among few of its homologs. On the other hand, most of the closely related homologues of FabI2 from UniRef50 database shared YX<sub>6</sub>K type catalytic domain (boxed in black).

# [Fig. S9, Raees Khan et al.]

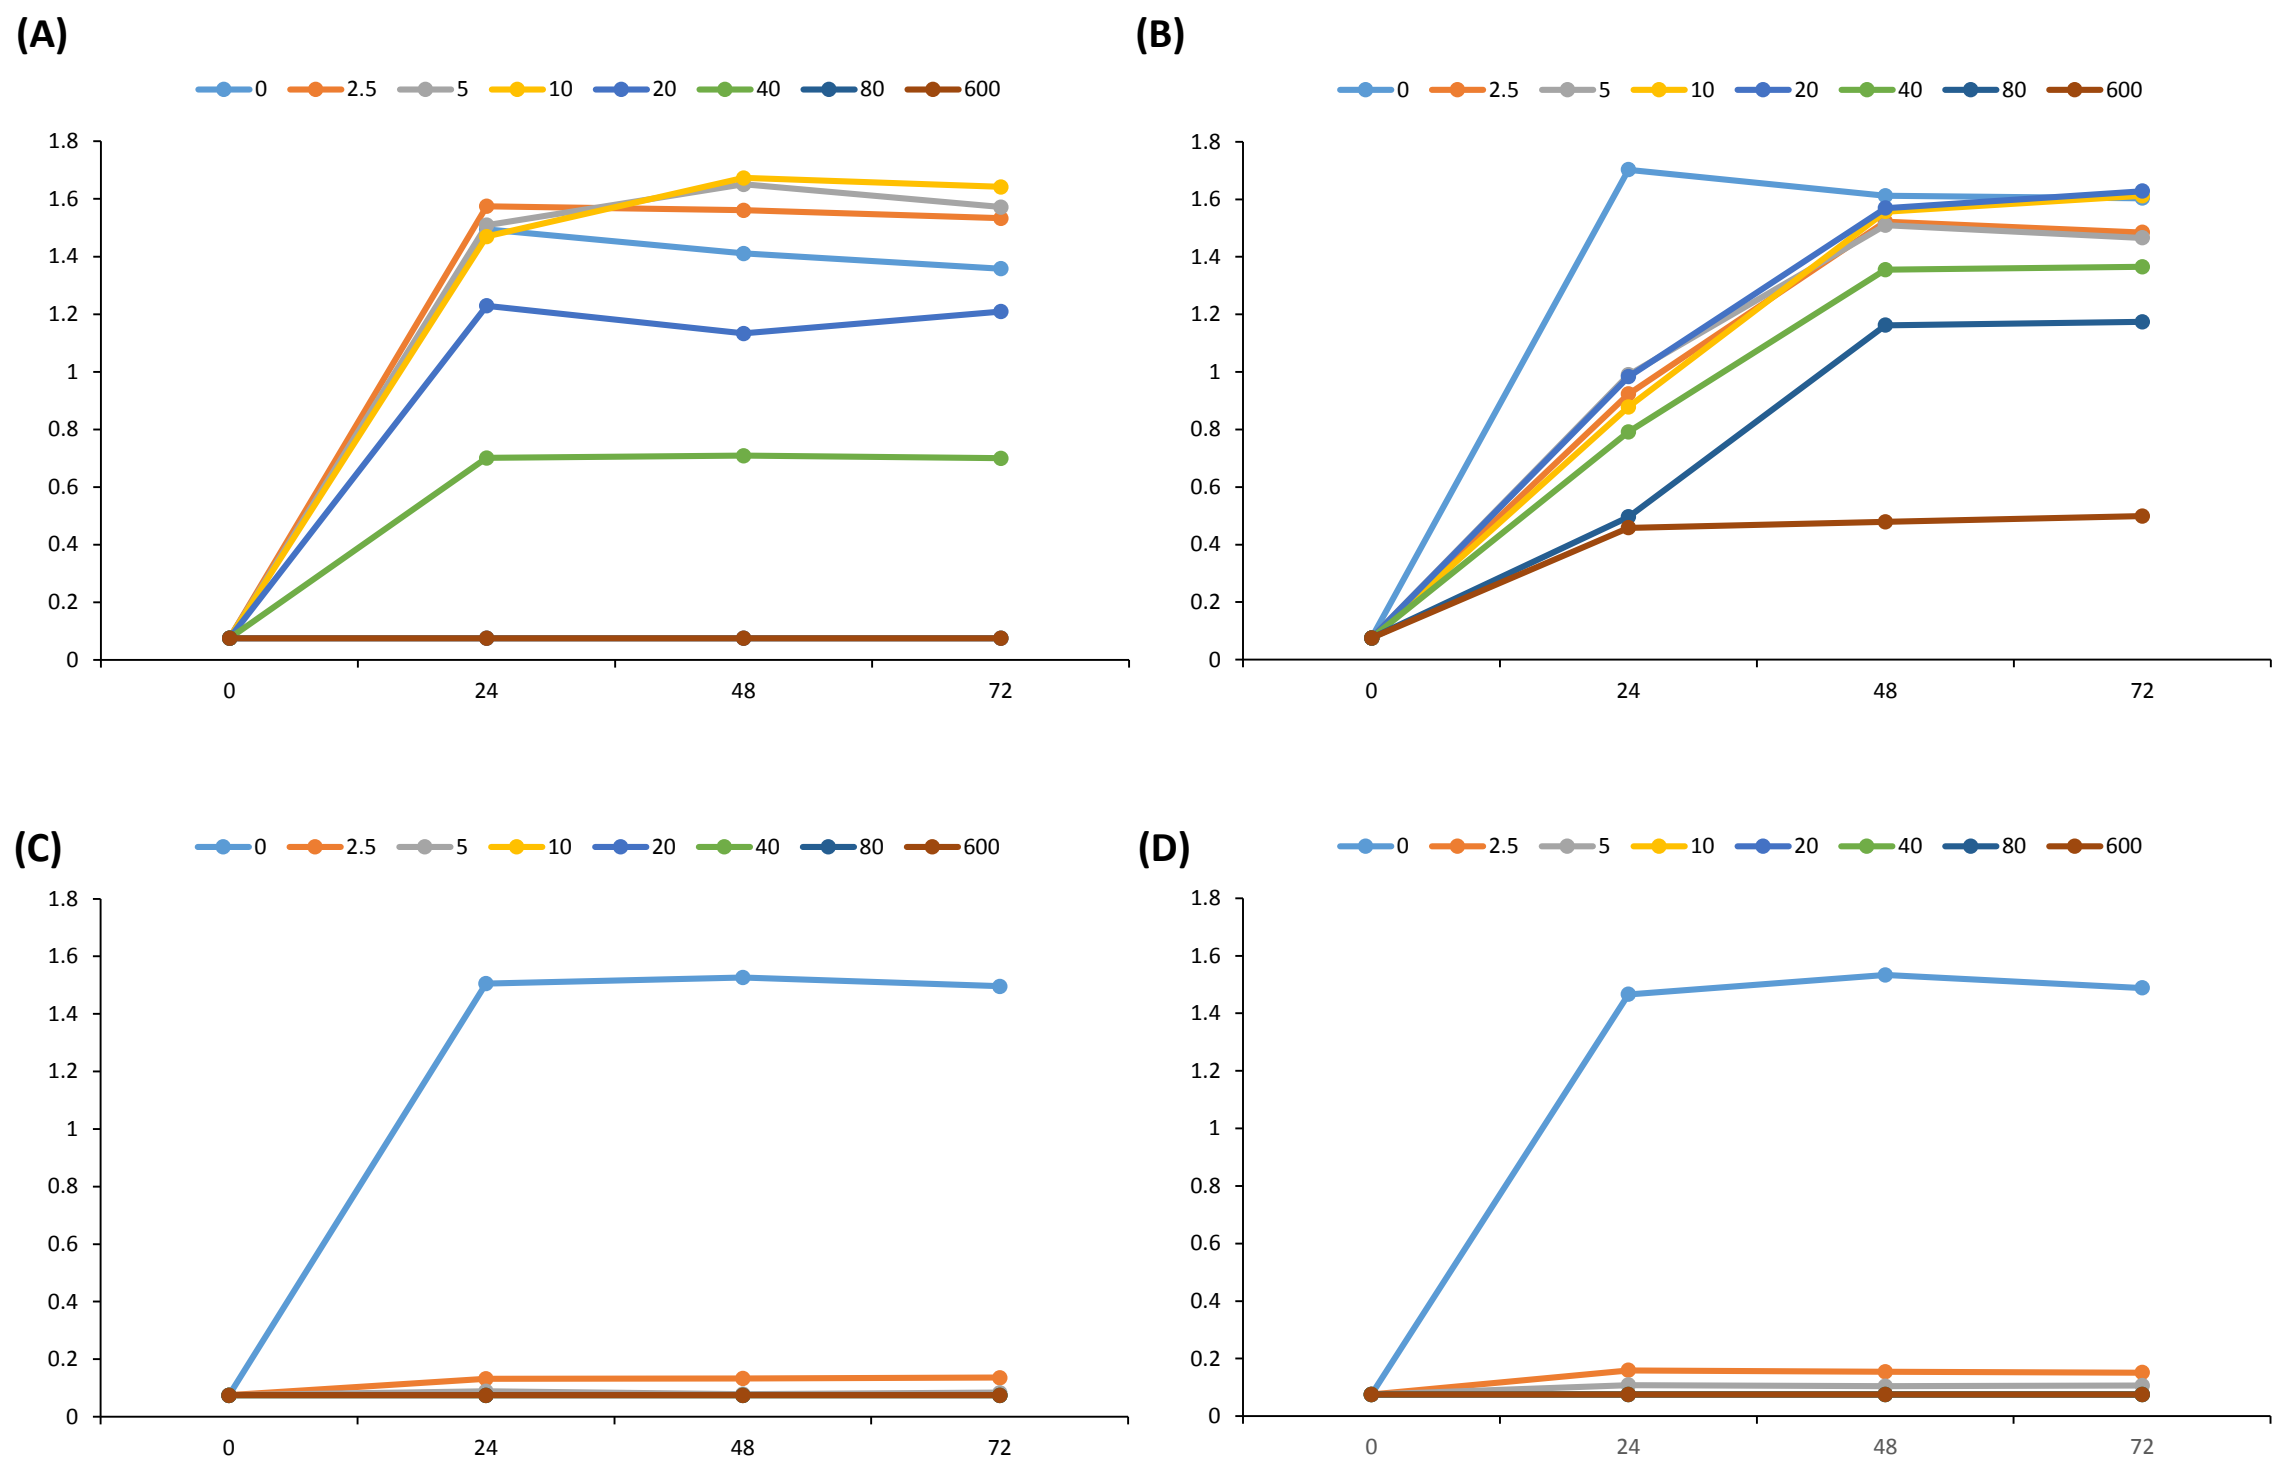

**Fig. S9. Comparative growth assay for FabI2 and mFabI2 under various concentrations of TCL.** All strains were grown in LB broth supplemented with various TCL concentrations (0–600 µg/ml). (A) Growth assay of *Escherichia coli* carrying FabI2 in pUC119. (B) Growth assay of *E. coli* carrying mFabI2 in pUC119. Two negative controls included were; (C) *E. coli* carrying prototypic FabI in pUC119 from *E. coli* K12 MG1655, and (D) *E. coli* carrying pUC119 vector only. Both of the negative controls were unable to grow at higher TCS concentrations (2.5–600 µg/ml). Legends are overlapped for higher TCL concentrations indicating no growth.

**Table S1.** Comparative identity of the metagenome derived novel FabI2 ENRs to known prototypic ENRs.

| Identity of FabI2 to known ENRs |               |               |              |                  |               |               |
|---------------------------------|---------------|---------------|--------------|------------------|---------------|---------------|
| <i>EcFabI</i>                   | <i>VcFabV</i> | <i>BsFabL</i> | <i>FabL2</i> | <i>S.pneFabK</i> | <i>CtFabI</i> | <i>TgFabI</i> |
| 30%                             | Partial       | 27%           | 24%          | Partial          | 67%           | 64 %          |

**Symbols and abbreviations;** Partial, these ENRs showed very low levels of similarity, only to a small region of the target prototypic ENR; *EcFabI*, FabI ENR from *Escherichia. coli*; *VcFabV*, FabV ENR from *Vibrio Cholera*; *BsFabL*, FabL from *Bacillus Subtillis*; *FabL2*, previously identified novel FabL like metagenomic ENR, *S.pneFabK*, FabK from *Streptococcus pneumonia*; *CtFabI*, FabI from *Chlamydia trachomatis*; *TgFabI*, FabI from *Toxoplasma gondii*.

**Table S2.** Kinetics of the metagenomic FabI2 ENR.

| <b>Substrate/cofactor</b> | <b>K<sub>m</sub> (μM)</b> | <b>K<sub>cat</sub> (min<sup>-1</sup>)</b> | <b>K<sub>cat</sub>/K<sub>m</sub> (μM<sup>-1</sup>min<sup>-1</sup>)</b> | <b>V<sub>max</sub> (μM/min)</b> |
|---------------------------|---------------------------|-------------------------------------------|------------------------------------------------------------------------|---------------------------------|
| Crotonyl-CoA              | 13.85                     | 0.19396                                   | 0.014                                                                  | 4.441                           |
| NADH                      | 18.21                     | 0.9546                                    | 0.052                                                                  | 14.67                           |

**Table S3:** Comparison of the type of YX<sub>n</sub>K catalytic domain of various enoyl-ACP reductases.

| <b>ENR</b>                                   | <b>Catalytic domain type</b> | <b>Reference</b> |
|----------------------------------------------|------------------------------|------------------|
| Most SDR members                             | YX <sub>3</sub> K            | [1, 2]           |
| FabI ( <i>Eschericia coli</i> )              | YX <sub>6</sub> K            | [3]              |
| FabL ( <i>Bacills subtilis</i> )             | YX <sub>6</sub> K            | [4]              |
| FabL2 (Metagenome/<br>Epsilonprtoeobacteria) | YX <sub>6</sub> K            | [5]              |
| FabV ( <i>Vibrio cholerae</i> )              | YX <sub>8</sub> K            | [6]              |
| FabK ( <i>Streptococcus pneumoniae</i> )     | FMN type                     | [7]              |
| <i>Brassica napus</i> ENR                    |                              | [3]              |
| <i>Arabidopsis thaliana</i> ENR              | YX <sub>7</sub> K            |                  |
| <i>Nicotinia tabacum</i> ENR                 |                              |                  |
| <b>FabI2</b>                                 | YX <sub>7</sub> K            | [This study]     |

Symbols and abbreviations; X in YX<sub>n</sub>K is any amino acid

**Table S4:** MIC of TCL for wild type FabI2 and its mutant mFabI2 (A128V).

| Clone  | TCL concentration in LB agar growth media ( $\mu\text{g/ml}$ ) |    |    |     |     |     |     |
|--------|----------------------------------------------------------------|----|----|-----|-----|-----|-----|
|        | 5                                                              | 20 | 50 | 100 | 200 | 400 | 600 |
| mFabI2 | +                                                              | +  | +  | +   | +   | +   | +   |
| FabI2  | +                                                              | +  | -  | -   | -   | -   | -   |

Symbols and Abbreviations: +; Positive growth, -; No growth

## References

1. Jornvall, H. *et al.* Short-chain dehydrogenases/reductases (SDR). *Biochemistry*. **34**, 6003–6013 (1995).
2. Filling, C. *et al.* Critical residues for structure and catalysis in shortchain dehydrogenases/reductases. *J. Biol. Chem.* **277**, 25677–25684 (2002).
3. Rozwarski, D. A., Vilcheze, C., Sugantino, M., Bittman, R. & Sacchettini, J. C. Crystal structure of the Mycobacterium tuberculosis enoyl-ACP reductase, InhA, in complex with NAD<sup>+</sup> and a C16 fatty acyl substrate. *J. Biol. Chem.* **274**, 15582–15589 (1999).
4. Heath, R. J., Su, N., Murphy, C. K. & Rock, C. O. The enoyl-[acyl-carrier-protein] reductases FabI and FabL from *Bacillus subtilis*. *J. Biol. Chem.* **275**, 40128–40133 (2000).
5. Khan, R., Zeb, A., Roy, N., Magar, R. T., Kim, H. J., Lee, K. W. & Lee, S-W. Biochemical and structural basis of triclosan resistance in a novel enoyl-acyl carrier protein reductase. *Antimicrob. Agents Chemother.* **62**, e00648–18 (2018).
6. Massengo-Tiasse, R. P. & Cronan, J. E. Vibrio cholerae FabV defines a new class of enoyl-acyl carrier protein reductase. *J. Biol. Chem.* **283**, 1308–1316 (2008).
7. Massengo-Tiassé, R. P., & Cronan, J. E. Diversity in enoyl-acyl carrier protein reductases. *Cell. Mol. Life Sci.* **66**, 1507–1517 (2009).
